# Supplementary material for: Unraveling Molecular Pathways Altered in MeCP2-Related Syndromes, in the Search for New Potential Avenues for Therapy
Source: MDPI journal article supplement (doi:10.3390/biomedicines9020148), 2021-02-03
Supplement: s1 [file s1]

**Table S1. List of probes used in this study**

| <i>Gene symbol</i> | <i>Chromosome</i> | <i>Unigene ID</i>            | <i>Assay ID</i> |                                                                    |
|--------------------|-------------------|------------------------------|-----------------|--------------------------------------------------------------------|
| <i>CACNA2D2</i>    | 3                 | Hs.476273                    | Hs01021049_m1   |                                                                    |
| <i>DNMT1</i>       | 19                | Hs.202672                    | Hs00945875_m1   |                                                                    |
| <i>IRAK1</i>       | X                 | Hs.522819                    | Hs01018347_m1   |                                                                    |
| <i>LIN28A</i>      | 1                 | Hs.86154                     | Hs00702808_s1   |                                                                    |
| <i>PTEN</i>        | 10                | Hs.500466                    | Hs02621230_s1   |                                                                    |
| <i>MECP2 E1</i>    | X                 | Hs.200716                    | Hs01598237_m1   |                                                                    |
| <i>MECP2 E2</i>    | X                 | Hs.200716                    | Hs00172845_m1   |                                                                    |
| <i>THBS1</i>       | 15                | Hs.164226                    | Hs00962908_m1   |                                                                    |
| <i>THBS3</i>       | 1                 | Hs.169875                    | Hs00938498_m1   |                                                                    |
| <i>GUSB</i>        | 7                 | Hs.255230                    | Hs00939627_m1   |                                                                    |
| <i>GAPDH</i>       | 12                | Hs.544577                    | Hs00939627_m1   |                                                                    |
| <i>ID</i>          | <i>Chromosome</i> | <i>Accession<br/>miRBase</i> | <i>Assay ID</i> | <i>Mature Sequence</i>                                             |
| hsa-miR-132-3p     | 17                | MI0000449                    | 000457          | UAACAGUCUACAGCCAUGGUCG                                             |
| hsa-miR-212-3p     | 17                | MI0000288                    | 000515          | UAACAGUCUCCAGUCACGGCC                                              |
| hsa-miR-137-3p     | 1                 | MI0000454                    | 001129          | UUAUUGCUUAAGAAUACGCGUAG                                            |
| hsa-miR-138-5p     | 3                 | MI0000476                    | 002284          | AGCUGGUGUUGUGAAUCAGGCCG                                            |
| hsa-miR-146a-5p    | 5                 | MI0000477                    | 000468          | UGAGAACUGAAUCCAUGGGUU                                              |
| hsa-miR-125b-5p    | 11                | MI0000446                    | 000449          | UCCCUGAGACCCUAACUUGUGA                                             |
| hsa-let-7a-5p      | 9                 | MI0000060                    | 000377          | UGAGGUAGUAGGUUGUAUAGUU                                             |
| hsa-let-7a-3p      | 9                 | MI0000060                    | 002307          | CUAUACAAUCUACUGUCUUUC                                              |
| hsa-miR-24-3p      | 9                 | MI0000080                    | 000402          | UGGCUCAGUUCAGCAGGAACAG                                             |
| hsa-miR-16-5p      | 13                | MI0000070                    | 000391          | UAGCAGCACGUAAAUAUUGGCG                                             |
| hsa-miR-483-5p     | 11                | MI0002467                    | 002338          | AAGACGGGAGGAAAGAAGGGAG                                             |
| RNU48              | 6                 | NR_002745                    | 001006          | GATGACCCCAGGTAAGTCTGAGTGT<br>GTCGCTGATGCCATCACC GCAGCGC<br>TCTGACC |

**Table S2. Spearman correlation of genes and miRNAs ratios with age.**

|                 | Controls |              | RTT    |                       | Controls |        | RTT    |
|-----------------|----------|--------------|--------|-----------------------|----------|--------|--------|
| <i>CACNA2D2</i> | q        | 0,351        | -0,071 | Let-7a-5p/miR-483-5p  | q        | 0,024  | -0,285 |
|                 | p        | 0,183        | 0,810  |                       | p        | 0,955  | 0,370  |
|                 | n        | 16           | 14     |                       | n        | 8      | 12     |
| <i>DNMT1</i>    | q        | 0,215        | 0,044  | Let-7a-5p/miR-146a-5p | q        | -0,246 | 0,221  |
|                 | p        | 0,408        | 0,870  |                       | p        | 0,466  | 0,447  |
|                 | n        | 17           | 16     |                       | n        | 11     | 14     |
| <i>IRAK1</i>    | q        | -0,097       | 0,289  | Let-7a-5p/miR-125b-5p | q        | -0,117 | 0,144  |
|                 | p        | 0,711        | 0,418  |                       | p        | 0,764  | 0,655  |
|                 | n        | 17           | 10     |                       | n        | 9      | 12     |
| <i>LIN28A</i>   | q        | -0,092       | -0,016 | Let-7a-5p/miR-132-3p  | q        | -0,067 | 0,470  |
|                 | p        | 0,707        | 0,954  |                       | p        | 0,864  | 0,145  |
|                 | n        | 19           | 15     |                       | n        | 9      | 11     |
| <i>MECP2 E1</i> | q        | 0,232        | 0,561  | miR-16-5p/miR-125b-5p | q        | 0,318  | 0,113  |
|                 | p        | 0,405        | 0,148  |                       | p        | 0,404  | 0,727  |
|                 | n        | 15           | 8      |                       | n        | 9      | 12     |
| <i>MECP2 E2</i> | q        | <b>,513*</b> | 0,135  | miR-24-3p/miR-132-3p  | q        | -0,243 | 0,425  |
|                 | p        | <b>0,042</b> | 0,709  |                       | p        | 0,529  | 0,221  |

|                       |   |        |              |                         |   |        |        |
|-----------------------|---|--------|--------------|-------------------------|---|--------|--------|
|                       | n | 16     | 10           |                         | n | 9      | 10     |
| <i>PTEN</i>           | q | -0,108 | -0,025       | miR-24-3p/miR-483-5p    | q | 0,156  | -0,367 |
|                       | p | 0,714  | 0,946        |                         | p | 0,713  | 0,241  |
|                       | n | 14     | 10           |                         | n | 8      | 12     |
| <i>THBS1</i>          | q | 0,007  | 0,261        | miR-24-3p/miR-146a-5p   | q | 0,000  | -0,030 |
|                       | p | 0,978  | 0,348        |                         | p | 1,000  | 0,919  |
|                       | n | 16     | 15           |                         | n | 11     | 14     |
| <i>THBS3</i>          | q | -0,106 | -0,215       | miR-24-3p/miR-125b-5p   | q | 0,000  | -0,158 |
|                       | p | 0,696  | 0,461        |                         | p | 1,000  | 0,623  |
|                       | n | 16     | 14           |                         | n | 9      | 12     |
| BDNF                  | q | -0,388 | 0,053        | miR-132-3p/miR-483-5p   | q | -0,100 | -0,530 |
|                       | p | 0,091  | 0,830        |                         | p | 0,873  | 0,280  |
|                       | n | 20     | 19           |                         | n | 5      | 6      |
| miR-483-5p/miR-16-5p  | q | -0,635 | <b>,602*</b> | miR-146a-5p/miR-132-3p  | q | 0,008  | 0,521  |
|                       | p | 0,091  | <b>0,050</b> |                         | p | 0,983  | 0,100  |
|                       | n | 8      | 11           |                         | n | 9      | 11     |
| miR-16-5p/miR-146a-5p | q | -0,023 | 0,002        | miR-125b-5p/miR-132-3p  | q | -0,036 | -0,458 |
|                       | p | 0,947  | 0,994        |                         | p | 0,939  | 0,254  |
|                       | n | 11     | 14           |                         | n | 7      | 8      |
| Let-7a-5p/miR-16-5p   | q | -0,123 | 0,078        | miR-146a-5p/miR-483-5p  | q | 0,126  | -0,126 |
|                       | p | 0,718  | 0,792        |                         | p | 0,748  | 0,667  |
|                       | n | 11     | 14           |                         | n | 9      | 14     |
| miR-132-3p/miR-16-5p  | q | -0,084 | 0,211        | miR-125b-5p/miR-483-5p  | q | -0,310 | -0,162 |
|                       | p | 0,831  | 0,534        |                         | p | 0,354  | 0,581  |
|                       | n | 9      | 11           |                         | n | 11     | 14     |
| miR-24-3p/miR-16-5p   | q | 0,059  | -0,044       | miR-146a-5p/miR-125b-5p | q | 0,205  | -0,155 |
|                       | p | 0,863  | 0,881        |                         | p | 0,545  | 0,631  |
|                       | n | 11     | 14           |                         | n | 11     | 12     |
| miR-24-3p/Let-7a-5p   | q | 0,419  | -0,241       |                         |   |        |        |
|                       | p | 0,199  | 0,406        |                         |   |        |        |
|                       | n | 11     | 14           |                         |   |        |        |

Spearman correlation ( $\rho$ ) between gene and miRNA ratios expressions with age. 1 is positive correlation, 0 no correlation and  $-1$  is negative correlation. Statistically significant correlations ( $p < 0.05$ ) are highlighted in bold.

**Table S3. mRNA and miRNA ratios performance as RTT stratification biomarkers.**

|                       | Mutation type<br>(NS vs. MS) |              |          | Onset<br>(<12 m vs. >12m) |         |          |
|-----------------------|------------------------------|--------------|----------|---------------------------|---------|----------|
|                       | AUC                          | P-value      | n        | AUC                       | P-value | n        |
| <i>CACNA2D2</i>       | 0.563                        | 0.699        | 5 vs. 9  | 0.533                     | 0.841   | 5 vs. 9  |
| <i>DNMT1</i>          | 0.578                        | 0.6          | 5 vs. 11 | 0.509                     | 0.955   | 5 vs. 11 |
| <i>IRAK1</i>          | 0.68                         | 0.347        | 8 vs. 2  | 0.625                     | 0.602   | 8 vs. 2  |
| <i>LIN28A</i>         | 0.696                        | 0.203        | 4 vs. 11 | 0.568                     | 0.695   | 4 vs. 11 |
| <i>MECP2 E1</i>       | 0.563                        | 0.773        | 2 vs. 6  | 0.75                      | 0.317   | 2 vs. 6  |
| <i>MECP2 E2</i>       | 0.56                         | 0.754        | 2 vs. 8  | 0.75                      | 0.296   | 2 vs. 8  |
| <i>PTEN</i>           | 0.64                         | 0.465        | 2 vs. 8  | 0.625                     | 0.602   | 2 vs. 8  |
| <i>THBS1</i>          | 0.714                        | 0.165        | 5 vs. 10 | 0.54                      | 0.806   | 5 vs. 10 |
| <i>THBS3</i>          | 0.51                         | 0.949        | 4 vs. 10 | 0.625                     | 0.48    | 4 vs. 10 |
| BDNF                  | 0.811                        | <b>0.022</b> | 7 vs. 12 | 0.536                     | 0.8     | 7 vs. 12 |
| miR-24-3p/Let-7a-5p   | 0.531                        | 0.848        | 7 vs. 7  | 0.625                     | 0.439   | 6 vs. 8  |
| Let-7a-5p/miR-483-5p  | 0.611                        | 0.522        | 6 vs. 6  | 0.667                     | 0.337   | 6 vs. 6  |
| Let-7a-5p/miR-146a-5p | 0.551                        | 0.749        | 7 vs. 7  | 0.563                     | 0.699   | 6 vs. 8  |
| Let-7a-5p/miR-125b-5p | 0.6                          | 0.57         | 5 vs. 7  | 0.514                     | 0.935   | 5 vs. 7  |

|                         |       |       |         |       |       |         |
|-------------------------|-------|-------|---------|-------|-------|---------|
| Let-7a-5p/miR-132-3p    | 0.533 | 0.855 | 5 vs. 6 | 0.679 | 0.345 | 4 vs. 7 |
| miR-483-5p/miR-16-5p    | 0.625 | 0.508 | 4 vs. 7 | 0.55  | 0.784 | 6 vs. 5 |
| Let-7a-5p/miR-16-5p     | 0.602 | 0.523 | 7 vs. 7 | 0.708 | 0.197 | 6 vs. 8 |
| miR-132-3p/miR-16-5p    | 0.5   | 1     | 5 vs. 6 | 0.821 | 0.089 | 4 vs. 7 |
| miR-24-3p/miR-16-5p     | 0.633 | 0.406 | 7 vs. 7 | 0.688 | 0.245 | 6 vs. 8 |
| miR-16-5p/miR-125b-5p   | 0.529 | 0.871 | 5 vs. 7 | 0.686 | 0.291 | 5 vs. 7 |
| miR-24-3p/miR-132-3p    | 0.667 | 0.394 | 4 vs. 6 | 0.792 | 0.136 | 4 vs. 6 |
| miR-16-5p/miR-146a-5p   | 0.612 | 0.482 | 7 vs. 7 | 0.625 | 0.439 | 6 vs. 8 |
| miR-24-3p/miR-483-5p    | 0.743 | 0.167 | 5 vs. 7 | 0.694 | 0.262 | 6 vs. 6 |
| miR-24-3p/miR-146a-5p   | 0.551 | 0.749 | 7 vs. 7 | 0.552 | 0.747 | 6 vs. 8 |
| miR-24-3p/miR-125b-5p   | 0.686 | 0.291 | 5 vs. 7 | 0.6   | 0.57  | 5 vs. 7 |
| miR-132-3p/miR-483-5p   | 0.667 | 0.513 | 3 vs. 3 | 1     | 0.064 | 4 vs. 2 |
| miR-146a-5p/miR-132-3p  | 0.533 | 0.855 | 5 vs. 6 | 0.643 | 0.45  | 4 vs. 7 |
| miR-125b-5p/miR-132-3p  | 0.667 | 0.505 | 2 vs. 6 | 0.533 | 0.881 | 3 vs. 5 |
| miR-146a-5p/miR-483-5p  | 0.653 | 0.338 | 7 vs. 7 | 0.667 | 0.302 | 6 vs. 8 |
| miR-125b-5p/miR-483-5p  | 0.592 | 0.565 | 7 vs. 7 | 0.792 | 0.071 | 6 vs. 8 |
| miR-146a-5p/miR-125b-5p | 0.657 | 0.372 | 5 vs. 7 | 0.514 | 0.935 | 5 vs. 7 |

|                         | Microcephaly<br>(Yes vs. No) |         |          | Sitting alone<br>(Yes vs. No) |         |          |
|-------------------------|------------------------------|---------|----------|-------------------------------|---------|----------|
|                         | AUC                          | P-value | n        | AUC                           | P-value | n        |
| <i>CACNA2D2</i>         | 0.6                          | 0.572   | 10 vs. 4 | 0.542                         | 0.855   | 2 vs. 12 |
| <i>DNMT1</i>            | 0.625                        | 0.467   | 12 vs. 4 | 0.643                         | 0.525   | 2 vs. 14 |
| <i>IRAK1</i>            | 0.571                        | 0.732   | 7 vs. 3  | 0.75                          | 0.296   | 2 vs. 8  |
| <i>LIN28A</i>           | 0.636                        | 0.433   | 11 vs. 4 | 0.654                         | 0.497   | 2 vs. 13 |
| <i>MECP2 E1</i>         | 0.6                          | 0.655   | 5 vs. 3  | -                             | -       | -        |
| <i>MECP2 E2</i>         | 0.667                        | 0.425   | 7 vs. 3  | 0.875                         | 0.117   | 2 vs. 8  |
| <i>PTEN</i>             | 0.762                        | 0.21    | 7 vs. 3  | 0.875                         | 0.117   | 2 vs. 8  |
| <i>THBS1</i>            | 0.545                        | 0.794   | 11 vs. 4 | 0.692                         | 0.396   | 2 vs. 13 |
| <i>THBS3</i>            | 0.55                         | 0.777   | 10 vs. 4 | 0.833                         | 0.144   | 2 vs. 12 |
| <i>BDNF</i>             | 0.55                         | 0.764   | 15 vs. 4 | 0.824                         | 0.144   | 2 vs. 17 |
| miR-24-3p/Let-7a-5p     | 0.667                        | 0.392   | 11 vs. 3 | 0.769                         | 0.385   | 1 vs. 13 |
| Let-7a-5p/miR-483-5p    | 0.815                        | 0.116   | 9 vs. 3  | -                             | -       | -        |
| Let-7a-5p/miR-146a-5p   | 0.606                        | 0.586   | 11 vs. 3 | 0.615                         | 0.71    | 1 vs. 13 |
| Let-7a-5p/miR-125b-5p   | 0.963                        | 0.021   | 9 vs. 3  | -                             | -       | -        |
| Let-7a-5p/miR-132-3p    | 0.75                         | 0.221   | 8 vs. 3  | 0.7                           | 0.527   | 1 vs. 10 |
| miR-483-5p/miR-16-5p    | 0.875                        | 0.066   | 8 vs. 3  | -                             | -       | -        |
| Let-7a-5p/miR-16-5p     | 0.924                        | 0.029   | 11 vs. 3 | 0.769                         | 0.385   | 1 vs. 13 |
| miR-132-3p/miR-16-5p    | 0.875                        | 0.066   | 8 vs. 3  | 0.9                           | 0.206   | 1 vs. 10 |
| miR-24-3p/miR-16-5p     | 0.758                        | 0.186   | 11 vs. 3 | 0.846                         | 0.264   | 1 vs. 13 |
| miR-16-5p/miR-125b-5p   | 0.556                        | 0.782   | 9 vs. 3  | -                             | -       | -        |
| miR-24-3p/miR-132-3p    | 0.905                        | 0.053   | 7 vs. 3  | 0.778                         | 0.384   | 1 vs. 9  |
| miR-16-5p/miR-146a-5p   | 0.788                        | 0.139   | 11 vs. 3 | 0.769                         | 0.385   | 1 vs. 13 |
| miR-24-3p/miR-483-5p    | 0.667                        | 0.405   | 9 vs. 3  | -                             | -       | -        |
| miR-24-3p/miR-146a-5p   | 0.712                        | 0.276   | 11 vs. 3 | 0.846                         | 0.264   | 1 vs. 13 |
| miR-24-3p/miR-125b-5p   | 0.852                        | 0.079   | 9 vs. 3  | -                             | -       | -        |
| miR-132-3p/miR-483-5p   | 0.556                        | 0.827   | 3 vs. 3  | -                             | -       | -        |
| miR-146a-5p/miR-132-3p  | 0.917                        | 0.041   | 8 vs. 3  | 0.6                           | 0.752   | 1 vs. 10 |
| miR-125b-5p/miR-132-3p  | 0.8                          | 0.18    | 5 vs. 3  | -                             | -       | -        |
| miR-146a-5p/miR-483-5p  | 0.758                        | 0.186   | 11 vs. 3 | 0.692                         | 0.535   | 1 vs. 13 |
| miR-125b-5p/miR-483-5p  | 0.788                        | 0.139   | 11 vs. 3 | 0.692                         | 0.535   | 1 vs. 13 |
| miR-146a-5p/miR-125b-5p | 0.889                        | 0.052   | 9 vs. 3  | -                             | -       | -        |

|                         | Ambulation<br>(Yes vs. No) |         |          | Language<br>(Yes vs. No)             |         |          |
|-------------------------|----------------------------|---------|----------|--------------------------------------|---------|----------|
|                         | AUC                        | P-value | n        | AUC                                  | P-value | n        |
| <i>CACNA2D2</i>         | 0.708                      | 0.197   | 6 vs. 8  | 0.575                                | 0.671   | 10 vs. 4 |
| <i>DNMT1</i>            | 0.766                      | 0.074   | 8 vs. 8  | 0.708                                | 0.225   | 12 vs. 4 |
| <i>IRAK1</i>            | 0.5                        | 1       | 4 vs. 6  | 0.625                                | 0.522   | 6 vs. 4  |
| <i>LIN28A</i>           | 0.679                      | 0.247   | 8 vs. 7  | 0.864                                | 0.037   | 11 vs. 4 |
| <i>MECP2 E1</i>         | 0.667                      | 0.505   | 2 vs.6   | 0.75                                 | 0.248   | 4 vs. 4  |
| <i>MECP2 E2</i>         | 0.792                      | 0.136   | 4 vs. 6  | 0.5                                  | 1       | 6 vs. 4  |
| <i>PTEN</i>             | 0.625                      | 0.522   | 4 vs. 6  | 0.542                                | 0.831   | 6 vs. 4  |
| <i>THBS1</i>            | 0.75                       | 0.105   | 7 vs. 8  | 0.818                                | 0.068   | 11 vs. 4 |
| <i>THBS3</i>            | 0.729                      | 0.156   | 6 vs. 8  | 0.725                                | 0.203   | 10 vs. 4 |
| <i>BDNF</i>             | 0.511                      | 0.934   | 8 vs. 11 | 0.65                                 | 0.368   | 15 vs. 4 |
| miR-24-3p/Let-7a-5p     | 0.511                      | 0.947   | 5 vs. 9  | 0.727                                | 0.246   | 11 vs. 3 |
| Let-7a-5p/miR-483-5p    | 0.531                      | 0.865   | 4 vs. 8  | 0.519                                | 0.926   | 9 vs. 3  |
| Let-7a-5p/miR-146a-5p   | 0.644                      | 0.386   | 5 vs. 9  | 0.636                                | 0.484   | 11 vs. 3 |
| Let-7a-5p/miR-125b-5p   | 0.667                      | 0.405   | 3 vs. 9  | 0.704                                | 0.309   | 9 vs. 3  |
| Let-7a-5p/miR-132-3p    | 0.679                      | 0.345   | 4 vs. 7  | 0.667                                | 0.414   | 8 vs. 3  |
| miR-483-5p/miR-16-5p    | 0.667                      | 0.414   | 3 vs. 8  | 0.889                                | 0.099   | 9 vs. 2  |
| Let-7a-5p/miR-16-5p     | 0.522                      | 0.894   | 5 vs. 9  | 0.591                                | 0.64    | 11 vs. 3 |
| miR-132-3p/miR-16-5p    | 0.583                      | 0.683   | 3 vs. 8  | 0.542                                | 0.838   | 8 vs. 3  |
| miR-24-3p/miR-16-5p     | 0.6                        | 0.549   | 5 vs. 9  | 0.545                                | 0.815   | 11 vs. 3 |
| miR-16-5p/miR-125b-5p   | 0.611                      | 0.579   | 3 vs. 9  | 0.63                                 | 0.518   | 9 vs. 3  |
| miR-24-3p/miR-132-3p    | 0.571                      | 0.732   | 3 vs. 7  | 0.571                                | 0.732   | 7 vs. 3  |
| miR-16-5p/miR-146a-5p   | 0.622                      | 0.463   | 5 vs. 9  | 0.515                                | 0.938   | 11 vs. 3 |
| miR-24-3p/miR-483-5p    | 0.741                      | 0.229   | 3 vs. 9  | 0.667                                | 0.405   | 9 vs. 3  |
| miR-24-3p/miR-146a-5p   | 0.656                      | 0.351   | 5 vs. 9  | 0.652                                | 0.436   | 11 vs. 3 |
| miR-24-3p/miR-125b-5p   | 0.741                      | 0.229   | 3 vs. 9  | 0.519                                | 0.926   | 9 vs. 3  |
| miR-132-3p/miR-483-5p   | 0.8                        | 0.38    | 1 vs. 5  | 1                                    | 0.05    | 3 vs. 3  |
| miR-146a-5p/miR-132-3p  | 0.643                      | 0.45    | 4 vs. 7  | 0.708                                | 0.307   | 8 vs. 3  |
| miR-125b-5p/miR-132-3p  | 0.857                      | 0.275   | 1 vs. 7  | 0.533                                | 0.881   | 5 vs. 3  |
| miR-146a-5p/miR-483-5p  | 0.667                      | 0.317   | 5 vs. 9  | 0.545                                | 0.815   | 11 vs. 3 |
| miR-125b-5p/miR-483-5p  | 0.711                      | 0.205   | 5 vs. 9  | 0.848                                | 0.073   | 11 vs. 3 |
| miR-146a-5p/miR-125b-5p | 0.741                      | 0.229   | 3 vs. 9  | 0.556                                | 0.782   | 9 vs. 3  |
|                         | Epilepsy<br>(Yes vs. No)   |         |          | Respiratory dysfunction (Yes vs. No) |         |          |
|                         | AUC                        | P-value | n        | AUC                                  | P-value | n        |
| <i>CACNA2D2</i>         | 0.576                      | 0.697   | 11 vs. 3 | 0.525                                | 0.888   | 10 vs. 4 |
| <i>DNMT1</i>            | 0.59                       | 0.638   | 13 vs. 3 | 0.563                                | 0.716   | 12 vs. 4 |
| <i>IRAK1</i>            | 0.625                      | 0.602   | 8 vs. 2  | 0.571                                | 0.732   | 7 vs. 3  |
| <i>LIN28A</i>           | 0.556                      | 0.773   | 12 vs. 3 | 0.659                                | 0.361   | 11 vs. 4 |
| <i>MECP2 E1</i>         | 0.75                       | 0.317   | 6 vs. 2  | 0.533                                | 0.881   | 5 vs. 3  |
| <i>MECP2 E2</i>         | 0.75                       | 0.296   | 8 vs. 2  | 0.714                                | 0.305   | 7 vs. 3  |
| <i>PTEN</i>             | 0.625                      | 0.602   | 8 vs. 2  | 0.524                                | 0.909   | 7 vs. 3  |
| <i>THBS1</i>            | 0.583                      | 0.662   | 12 vs. 3 | 0.568                                | 0.695   | 11 vs. 4 |
| <i>THBS3</i>            | 0.606                      | 0.586   | 11 vs. 3 | 0.7                                  | 0.258   | 10 vs. 4 |
| <i>BDNF</i>             | 0.5                        | 1       | 16 vs. 3 | 0.517                                | 0.92    | 15 vs. 4 |
| miR-24-3p/Let-7a-5p     | 0.542                      | 0.855   | 12 vs. 2 | 0.545                                | 0.815   | 11 vs. 3 |
| Let-7a-5p/miR-483-5p    | 0.65                       | 0.519   | 10 vs. 2 | 0.593                                | 0.644   | 9 vs. 3  |
| Let-7a-5p/miR-146a-5p   | 0.625                      | 0.584   | 12 vs. 2 | 0.515                                | 0.938   | 11 vs. 3 |
| Let-7a-5p/miR-125b-5p   | 0.85                       | 0.133   | 10 vs. 2 | 0.667                                | 0.405   | 9 vs. 3  |

|                         |                                   |                |          |                                                     |                |          |
|-------------------------|-----------------------------------|----------------|----------|-----------------------------------------------------|----------------|----------|
| Let-7a-5p/miR-132-3p    | 0.556                             | 0.814          | 9 vs. 2  | 0.583                                               | 0.683          | 8 vs. 3  |
| miR-483-5p/miR-16-5p    | 0.778                             | 0.239          | 9 vs. 2  | 0.778                                               | 0.239          | 9 vs. 2  |
| Let-7a-5p/miR-16-5p     | 0.813                             | 0.171          | 12 vs. 2 | 0.3                                                 | 0.876          | 11 vs. 3 |
| miR-132-3p/miR-16-5p    | 0.944                             | 0.059          | 9 vs. 2  | 0.625                                               | 0.54           | 8 vs. 3  |
| miR-24-3p/miR-16-5p     | 0.875                             | 0.1            | 12 vs. 2 | 0.576                                               | 0.697          | 11 vs. 3 |
| miR-16-5p/miR-125b-5p   | 0.55                              | 0.83           | 10 vs. 2 | 0.667                                               | 0.405          | 9 vs. 3  |
| miR-24-3p/miR-132-3p    | 0.938                             | 0.068          | 8 vs. 2  | 0.619                                               | 0.569          | 7 vs. 3  |
| miR-16-5p/miR-146a-5p   | 0.833                             | 0.144          | 12 vs. 2 | 0.545                                               | 0.815          | 11 vs. 3 |
| miR-24-3p/miR-483-5p    | 0.8                               | 0.197          | 10 vs. 2 | 0.519                                               | 0.926          | 9 vs. 3  |
| miR-24-3p/miR-146a-5p   | 0.563                             | 0.784          | 12 vs. 2 | 0.53                                                | 0.876          | 11 vs. 3 |
| miR-24-3p/miR-125b-5p   | 0.95                              | 0.053          | 10 vs. 2 | 0.667                                               | 0.405          | 9 vs. 3  |
| miR-132-3p/miR-483-5p   | 0.75                              | 0.355          | 4 vs. 2  | 0.556                                               | 0.827          | 3 vs. 3  |
| miR-146a-5p/miR-132-3p  | 0.833                             | 0.157          | 9 vs. 2  | 0.853                                               | 0.683          | 8 vs. 3  |
| miR-125b-5p/miR-132-3p  | 0.75                              | 0.317          | 6 vs. 2  | 0.6                                                 | 0.655          | 5 vs. 3  |
| miR-146a-5p/miR-483-5p  | 0.833                             | 0.144          | 12 vs. 2 | 0.545                                               | 0.815          | 11 vs. 3 |
| miR-125b-5p/miR-483-5p  | 0.667                             | 0.465          | 12 vs. 2 | 0.818                                               | 0.102          | 11 vs. 3 |
| miR-146a-5p/miR-125b-5p | 0.85                              | 0.133          | 10 vs. 2 | 0.593                                               | 0.644          | 9 vs. 3  |
| <hr/>                   |                                   |                |          |                                                     |                |          |
|                         | <b>Hands use<br/>(Yes vs. No)</b> |                |          | <b>Onset stereotypies<br/>(&lt;36m vs. &gt;36m)</b> |                |          |
|                         | <b>AUC</b>                        | <b>P-value</b> | <b>n</b> | <b>AUC</b>                                          | <b>P-value</b> | <b>n</b> |
| <i>CACNA2D2</i>         | 0.606                             | 0.586          | 11 vs. 3 | 0.644                                               | 0.385          | 5 vs. 9  |
| <i>DNMT1</i>            | 0.59                              | 0.638          | 13 vs. 3 | 0.6                                                 | 0.533          | 5 vs. 11 |
| <i>IRAK1</i>            | 0.778                             | 0.384          | 9 vs. 1  | 0.75                                                | 0.201          | 4 vs. 6  |
| <i>LIN28A</i>           | 0.692                             | 0.396          | 13 vs. 2 | 0.52                                                | 0.903          | 5 vs. 10 |
| <i>MECP2 E1</i>         | 0.571                             | 0.827          | 7 vs. 1  | 0.733                                               | 0.297          | 5 vs. 3  |
| <i>MECP2 E2</i>         | 0.667                             | 0.602          | 9 vs. 1  | 0.542                                               | 0.831          | 4 vs. 6  |
| <i>PTEN</i>             | 0.667                             | 0.602          | 9 vs. 1  | 0.583                                               | 0.67           | 4 vs. 6  |
| <i>THBS1</i>            | 0.667                             | 0.386          | 12 vs. 3 | 0.64                                                | 0.391          | 5 vs. 10 |
| <i>THBS3</i>            | 0.606                             | 0.586          | 11 vs. 3 | 0.511                                               | 0.947          | 5 vs. 9  |
| <i>BDNF</i>             | 0.813                             | 0.094          | 16 vs. 3 | 0.577                                               | 0.599          | 6 vs. 13 |
| miR-24-3p/Let-7a-5p     | 0.708                             | 0.361          | 12 vs. 2 | 0.511                                               | 0.947          | 5 vs. 9  |
| Let-7a-5p/miR-483-5p    | 0.6                               | 0.667          | 10 vs. 2 | 0.656                                               | 0.396          | 4 vs. 8  |
| Let-7a-5p/miR-146a-5p   | 0.833                             | 0.144          | 12 vs. 2 | 0.556                                               | 0.739          | 5 vs. 9  |
| Let-7a-5p/miR-125b-5p   | 0.65                              | 0.519          | 10 vs. 2 | 0.563                                               | 0.734          | 4 vs. 8  |
| Let-7a-5p/miR-132-3p    | 0.5                               | 1              | 9 vs. 2  | 0.714                                               | 0.257          | 4 vs. 7  |
| miR-483-5p/miR-16-5p    | 0.667                             | 0.48           | 9 vs. 2  | 0.571                                               | 0.705          | 4 vs. 7  |
| Let-7a-5p/miR-16-5p     | 0.625                             | 0.584          | 12 vs. 2 | 0.633                                               | 0.424          | 5 vs. 9  |
| miR-132-3p/miR-16-5p    | 0.611                             | 0.637          | 9 vs. 2  | 0.571                                               | 0.705          | 4 vs. 7  |
| miR-24-3p/miR-16-5p     | 0.583                             | 0.715          | 12 vs. 2 | 0.6                                                 | 0.549          | 5 vs. 9  |
| miR-16-5p/miR-125b-5p   | 0.7                               | 0.39           | 10 vs. 2 | 0.594                                               | 0.61           | 4 vs. 8  |
| miR-24-3p/miR-132-3p    | 0.625                             | 0.602          | 8 vs. 2  | 0.542                                               | 0.831          | 4 vs. 6  |
| miR-16-5p/miR-146a-5p   | 0.542                             | 0.855          | 12 vs. 2 | 0.622                                               | 0.463          | 5 vs. 9  |
| miR-24-3p/miR-483-5p    | 0.65                              | 0.519          | 10 vs. 2 | 0.531                                               | 0.865          | 4 vs. 8  |
| miR-24-3p/miR-146a-5p   | 0.792                             | 0.201          | 12 vs. 2 | 0.589                                               | 0.594          | 5 vs. 9  |
| miR-24-3p/miR-125b-5p   | 0.7                               | 0.39           | 10 vs. 2 | 0.531                                               | 0.865          | 4 vs. 8  |
| miR-132-3p/miR-483-5p   | 0.875                             | 0.165          | 4 vs. 2  | 0.75                                                | 0.355          | 2 vs. 4  |
| miR-146a-5p/miR-132-3p  | 0.556                             | 0.814          | 9 vs. 2  | 0.5                                                 | 1              | 4 vs. 7  |
| miR-125b-5p/miR-132-3p  | 0.583                             | 0.739          | 6 vs. 2  | 0.733                                               | 0.297          | 3 vs. 5  |
| miR-146a-5p/miR-483-5p  | 0.583                             | 0.715          | 12 vs. 2 | 0.6                                                 | 0.549          | 5 vs. 9  |
| miR-125b-5p/miR-483-5p  | 0.5                               | 1              | 12 vs. 2 | 0.689                                               | 0.257          | 5 vs. 9  |
| miR-146a-5p/miR-125b-5p | 0.65                              | 0.519          | 10 vs. 2 | 0.531                                               | 0.865          | 4 vs. 8  |

|                         | Kyphoscoliosis<br>(Yes vs. No)     |         |          | Growth failure<br>(Yes vs. No) |         |          |
|-------------------------|------------------------------------|---------|----------|--------------------------------|---------|----------|
|                         | AUC                                | P-value | n        | AUC                            | P-value | n        |
| <i>CACNA2D2</i>         | 0.711                              | 0.205   | 5 vs. 9  | 0.542                          | 0.838   | 3 vs. 8  |
| <i>DNMT1</i>            | 0.778                              | 0.064   | 7 vs. 9  | 0.63                           | 0.518   | 3 vs. 9  |
| <i>IRAK1</i>            | 0.81                               | 0.138   | 3 vs. 7  | 1                              | 0.134   | 1 vs. 6  |
| <i>LIN28A</i>           | 0.607                              | 0.487   | 7 vs. 8  | 0.5                            | 1       | 2 vs. 9  |
| <i>MECP2 E1</i>         | 0.5                                | 1       | 2 vs. 6  | 1                              | 0.157   | 1 vs. 4  |
| <i>MECP2 E2</i>         | 0.667                              | 0.425   | 3 vs. 7  | 1                              | 0.134   | 1 vs. 6  |
| <i>PTEN</i>             | 0.667                              | 0.425   | 3 vs. 7  | 1                              | 0.134   | 1 vs. 6  |
| <i>THBS1</i>            | 0.667                              | 0.289   | 6 vs. 9  | 0.519                          | 0.926   | 3 vs. 9  |
| <i>THBS3</i>            | 0.833                              | 0.039   | 6 vs. 8  | 0.5                            | 1       | 3 vs. 8  |
| <i>BDNF</i>             | 0.522                              | 0.87    | 9 vs. 10 | 0.556                          | 0.724   | 6 vs. 9  |
| miR-24-3p/Let-7a-5p     | 0.694                              | 0.225   | 7 vs. 7  | 0.833                          | 0.055   | 6 vs. 6  |
| Let-7a-5p/miR-483-5p    | 0.528                              | 0.873   | 6 vs. 6  | 0.6                            | 0.602   | 5 vs. 5  |
| Let-7a-5p/miR-146a-5p   | 0.714                              | 0.18    | 7 vs. 7  | 0.75                           | 0.15    | 6 vs. 6  |
| Let-7a-5p/miR-125b-5p   | 0.528                              | 0.873   | 6 vs. 6  | 0.875                          | 0.055   | 6 vs. 4  |
| Let-7a-5p/miR-132-3p    | 0.786                              | 0.131   | 4 vs. 7  | 0.778                          | 0.197   | 3 vs. 6  |
| miR-483-5p/miR-16-5p    | 0.717                              | 0.235   | 6 vs. 5  | 0.75                           | 0.201   | 6 vs. 4  |
| Let-7a-5p/miR-16-5p     | 0.551                              | 0.749   | 7 vs. 7  | 0.611                          | 0.522   | 6 vs. 6  |
| miR-132-3p/miR-16-5p    | 0.667                              | 0.361   | 5 vs. 6  | 0.5                            | 1       | 4 vs. 5  |
| miR-24-3p/miR-16-5p     | 0.551                              | 0.749   | 7 vs. 7  | 0.528                          | 0.873   | 6 vs. 6  |
| miR-16-5p/miR-125b-5p   | 0.556                              | 0.749   | 6 vs. 6  | 0.875                          | 0.055   | 6 vs. 4  |
| miR-24-3p/miR-132-3p    | 0.5                                | 1       | 4 vs. 6  | 0.722                          | 0.302   | 3 vs. 6  |
| miR-16-5p/miR-146a-5p   | 0.592                              | 0.565   | 7 vs. 7  | 0.5                            | 1       | 6 vs. 6  |
| miR-24-3p/miR-483-5p    | 0.722                              | 0.2     | 6 vs. 6  | 0.5                            | 1       | 6 vs. 5  |
| miR-24-3p/miR-146a-5p   | 0.724                              | 0.16    | 7 vs. 7  | 0.639                          | 0.423   | 6 vs. 6  |
| miR-24-3p/miR-125b-5p   | 0.667                              | 0.337   | 6 vs. 6  | 0.667                          | 0.394   | 6 vs. 4  |
| miR-132-3p/miR-483-5p   | 1                                  | 0.143   | 1 vs. 5  | 0.5                            | 1       | 1 vs. 4  |
| miR-146a-5p/miR-132-3p  | 0.607                              | 0.571   | 4 vs. 7  | 0.889                          | 0.071   | 3 vs. 6  |
| miR-125b-5p/miR-132-3p  | 0.933                              | 0.053   | 3 vs. 5  | 0.917                          | 0.077   | 3 vs. 4  |
| miR-146a-5p/miR-483-5p  | 0.612                              | 0.482   | 7 vs. 7  | 0.528                          | 0.873   | 6 vs. 6  |
| miR-125b-5p/miR-483-5p  | 0.51                               | 0.949   | 7 vs. 7  | 0.75                           | 0.15    | 6 vs. 6  |
| miR-146a-5p/miR-125b-5p | 0.611                              | 0.522   | 6 vs. 6  | 0.667                          | 0.394   | 6 vs. 4  |
|                         | Vasomotor deficits<br>(Yes vs. No) |         |          | Bowel control<br>(Yes vs. No)  |         |          |
|                         | AUC                                | P-value | n        | AUC                            | P-value | n        |
| <i>CACNA2D2</i>         | 0.771                              | 0.093   | 8 vs. 6  | 0.8                            | 0.09    | 4 vs. 10 |
| <i>DNMT1</i>            | 0.75                               | 0.104   | 10 vs. 6 | 0.771                          | 0.115   | 4 vs. 12 |
| <i>IRAK1</i>            | 0.56                               | 0.754   | 5 vs. 5  | 0.889                          | 0.223   | 1 vs. 9  |
| <i>LIN28A</i>           | 0.667                              | 0.289   | 9 vs. 6  | 0.556                          | 0.773   | 3 vs. 12 |
| <i>MECP2 E1</i>         | 0.667                              | 0.456   | 3 vs. 5  | 0.857                          | 0.275   | 1 vs. 7  |
| <i>MECP2 E2</i>         | 0.72                               | 0.251   | 5 vs. 5  | 0.556                          | 0.862   | 1 vs. 9  |
| <i>PTEN</i>             | 0.68                               | 0.347   | 5 vs. 5  | 0.778                          | 0.384   | 1 vs. 9  |
| <i>THBS1</i>            | 0.611                              | 0.48    | 9 vs. 6  | 0.545                          | 0.794   | 4 vs. 11 |
| <i>THBS3</i>            | 0.688                              | 0.245   | 8 vs. 6  | 0.55                           | 0.777   | 4 vs. 10 |
| <i>BDNF</i>             | 0.69                               | 0.176   | 12 vs. 7 | 0.717                          | 0.194   | 4 vs. 15 |
| miR-24-3p/Let-7a-5p     | 0.533                              | 0.841   | 9 vs. 5  | 0.675                          | 0.322   | 4 vs. 10 |
| Let-7a-5p/miR-483-5p    | 0.8                                | 0.088   | 7 vs. 5  | 0.656                          | 0.396   | 4 vs. 8  |
| Let-7a-5p/miR-146a-5p   | 0.533                              | 0.841   | 9 vs. 5  | 0.725                          | 0.203   | 4 vs. 10 |
| Let-7a-5p/miR-125b-5p   | 0.857                              | 0.042   | 7 vs. 5  | 0.625                          | 0.497   | 4 vs. 8  |

|                         |       |       |         |       |       |          |
|-------------------------|-------|-------|---------|-------|-------|----------|
| Let-7a-5p/miR-132-3p    | 0.857 | 0.059 | 7 vs. 4 | 0.607 | 0.571 | 4 vs. 7  |
| miR-483-5p/miR-16-5p    | 0.75  | 0.186 | 7 vs. 4 | 0.646 | 0.475 | 3 vs. 8  |
| Let-7a-5p/miR-16-5p     | 0.944 | 0.008 | 9 vs. 5 | 0.6   | 0.572 | 4 vs. 10 |
| miR-132-3p/miR-16-5p    | 0.933 | 0.018 | 6 vs. 5 | 0.536 | 0.85  | 4 vs. 7  |
| miR-24-3p/miR-16-5p     | 0.889 | 0.02  | 9 vs. 5 | 0.575 | 0.671 | 4 vs. 10 |
| miR-16-5p/miR-125b-5p   | 0.7   | 0.256 | 7 vs. 5 | 0.844 | 0.062 | 4 vs. 8  |
| miR-24-3p/miR-132-3p    | 0.905 | 0.053 | 7 vs. 3 | 0.542 | 0.831 | 4 vs. 6  |
| miR-16-5p/miR-146a-5p   | 0.844 | 0.039 | 9 vs. 5 | 0.575 | 0.671 | 4 vs. 10 |
| miR-24-3p/miR-483-5p    | 0.813 | 0.089 | 8 vs. 4 | 0.531 | 0.865 | 4 vs. 8  |
| miR-24-3p/miR-146a-5p   | 0.567 | 0.689 | 9 vs. 5 | 0.687 | 0.289 | 4 vs. 10 |
| miR-24-3p/miR-125b-5p   | 0.8   | 0.088 | 7 vs. 5 | 0.563 | 0.734 | 4 vs. 8  |
| miR-132-3p/miR-483-5p   | 0.556 | 0.827 | 3 vs. 3 | 0.556 | 0.827 | 3 vs. 3  |
| miR-146a-5p/miR-132-3p  | 0.964 | 0.014 | 7 vs. 4 | 0.607 | 0.571 | 4 vs. 7  |
| miR-125b-5p/miR-132-3p  | 0.8   | 0.18  | 5 vs. 3 | 0.625 | 0.564 | 4 vs. 4  |
| miR-146a-5p/miR-483-5p  | 0.8   | 0.072 | 9 vs. 5 | 0.55  | 0.777 | 4 vs. 10 |
| miR-125b-5p/miR-483-5p  | 0.533 | 0.841 | 9 vs. 5 | 0.675 | 0.322 | 4 vs. 10 |
| miR-146a-5p/miR-125b-5p | 0.8   | 0.088 | 7 vs. 5 | 0.5   | 1     | 4 vs. 8  |

AUC: area under the curve. Statistical significant biomarkers are highlighted in grey.

**Table S4. Spearman correlation of genes and miRNAs ratios with severity score.**

|                 | RTT                         |                       | RTT                         |
|-----------------|-----------------------------|-----------------------|-----------------------------|
| <i>CACNA2D2</i> | q -0,221<br>p 0,447<br>n 14 | Let-7a-5p/miR-483-5p  | q 0,140<br>p 0,664<br>n 12  |
| <i>DNMT1</i>    | q -0,229<br>p 0,393<br>n 16 | Let-7a-5p/miR-146a-5p | q 0,320<br>p 0,265<br>n 14  |
| <i>IRAK1</i>    | q 0,140<br>p 0,699<br>n 10  | Let-7a-5p/miR-125b-5p | q 0,190<br>p 0,555<br>n 12  |
| <i>LIN28A</i>   | q 0,203<br>p 0,469<br>n 15  | Let-7a-5p/miR-132-3p  | q 0,023<br>p 0,947<br>n 11  |
| <i>MECP2 E1</i> | q -0,241<br>p 0,565<br>n 8  | miR-16-5p/miR-125b-5p | q 0,130<br>p 0,687<br>n 12  |
| <i>MECP2 E2</i> | q -0,354<br>p 0,316<br>n 10 | miR-24-3p/miR-132-3p  | q 0,335<br>p 0,343<br>n 10  |
| <i>PTEN</i>     | q -0,030<br>p 0,933<br>n 10 | miR-24-3p/miR-483-5p  | q -0,077<br>p 0,812<br>n 12 |
| <i>THBS1</i>    | q -0,323<br>p 0,240<br>n 15 | miR-24-3p/miR-146a-5p | q 0,003<br>p 0,991<br>n 14  |
| <i>THBS3</i>    | q -0,256<br>p 0,377<br>n 14 | miR-24-3p/miR-125b-5p | q 0,063<br>p 0,845<br>n 12  |
| <i>BDNF</i>     | q 0,013                     | miR-132-3p/miR-483-5p | q 0,257                     |

|                       |                             |                         |                             |
|-----------------------|-----------------------------|-------------------------|-----------------------------|
|                       | p 0,957<br>n 19             |                         | p 0,623<br>n 6              |
| miR-483-5p/miR-16-5p  | q 0,411<br>p 0,209<br>n 11  | miR-146a-5p/miR-132-3p  | q 0,132<br>p 0,698<br>n 11  |
| miR-16-5p/miR-146a-5p | q 0,020<br>p 0,946<br>n 14  | miR-125b-5p/miR-132-3p  | q -0,240<br>p 0,568<br>n 8  |
| Let-7a-5p/miR-16-5p   | q 0,212<br>p 0,467<br>n 14  | miR-146a-5p/miR-483-5p  | q -0,053<br>p 0,857<br>n 14 |
| miR-132-3p/miR-16-5p  | q 0,412<br>p 0,208<br>n 11  | miR-125b-5p/miR-483-5p  | q -0,283<br>p 0,328<br>n 14 |
| miR-24-3p/miR-16-5p   | q -0,011<br>p 0,970<br>n 14 | miR-146a-5p/miR-125b-5p | q 0,035<br>p 0,914<br>n 12  |
| miR-24-3p/Let-7a-5p   | q -0,313<br>p 0,275<br>n 14 |                         |                             |

Spearman correlation ( $\rho$ ) between gene and miRNA ratios expressions with severity score described by Monrós et al [23]. 1 is positive correlation, 0 no correlation and -1 is negative correlation.

**Table S5. Expression of miRNAs in plasma samples**

|                   | Controls (n=11)          | RTT (n= 14)                        | MDS. (n=1) | MDC (n=1)  |
|-------------------|--------------------------|------------------------------------|------------|------------|
| <b>miRNA (Ct)</b> |                          |                                    |            |            |
| miR-16-5p         | 22.59±0.95 [22.24-22.93] | <b>21.65±0.92 [21.36-21.94]***</b> | 22.66±0.02 | 23.65±0.22 |
| Let-7a-5p         | 30.02±2.12 [29.26-30.78] | <b>28.39±2.32 [27.66-29.12]***</b> | 28.42±0.06 | 30.4±0.02  |
| miR-24-3p         | 28.63±2.15 [27.74-29.52] | <b>27.13±2.32 [26.29-27.97]**</b>  | 28.96±0.03 | 30.84±0.08 |
| miR-146a-5p       | 29.69±2.38 [28.81-30.56] | <b>27.98±2.36 [27.24-28.73]***</b> | 29.01±0.08 | 30.92±0.08 |
| miR-125b-5p       | 32.98±0.81 [32.66-33.30] | <b>31.28±1.19 [30.87-31.70]***</b> | 32.22±0.21 | 34.98±0.42 |
| miR-483-5p        | 33.53±0.66 [33.22-33.84] | 33.55±0.68 [33.32-33.78]           | 32.99±0.02 | 34.08±0.32 |
| miR-132-3p        | 33.28±1.14 [32.81-33.75] | <b>32.32±1.48 [31.72-32.92]*</b>   | 33.34±0.20 | 34.66±0.13 |
| <b>miRNA (RQ)</b> |                          |                                    |            |            |
| miR-16-5p         | 1.19±0.82 [0.64-1.74]    | <b>2.21±1.39 [1.41-3.06]*</b>      | 0.93       | 0.47       |
| Let-7a-5p         | 6.08±13.72 [-3.14-15.30] | <b>15.03±22.03 [2.32-27.75]*</b>   | 4.60       | 1.40       |
| miR-24-3p         | 4.55±8.39 [-1.09-10.18]  | <b>16.40±26.13 [1.31-31.49]*</b>   | 1.36       | 0.37       |
| miR-146a-5p       | 9.57±20.89 [-4.46-23.61] | <b>21.26±35.55 [0.73-41.79]*</b>   | 3.19       | 0.84       |
| miR-125b-5p       | 1.26±0.86 [0.65-1.88]    | <b>4.74±4.95 [1.60-7.88]**</b>     | 1.83       | -          |
| miR-483-5p        | 1.37±0.68 [0.80-1.94]    | 1.33±0.62 [0.93-1.73]              | 1.74       | -          |
| miR-132-3p        | 1.50±1.39 [0.44-2.57]    | 2.87±3.10 [0.79-4.95]              | 1.02       | 0.41       |

Results shown as mean ± standard deviation. [inferior-superior] 95% confidence interval. Statistical significant differences highlighted in bold. \*  $p < 0.05$ , \*\*  $p < 0.01$ , \*\*\*  $p < 0.001$  significant difference respect controls (Mann-Whitney U Test). Ct: cycle threshold; MDC: *MECP2* duplication carrier, RQ: Relative Quantification.



**Table S6. Expression of RNAs in fibroblasts samples**

|                   | Controls (n=4)         | RTT (n=8)                       |
|-------------------|------------------------|---------------------------------|
| <b>miRNA (RQ)</b> |                        |                                 |
| miR-24-3p         | 1.00±0.10 [0.85-1.08]  | 0.94±0.27 [0.64-1.26]           |
| miR-146a-5p       | 1.25±0.96 [0.39-2.61]  | <b>0.19±0.09 [0.09-0.34]**</b>  |
| miR-132-3p        | 1.04±0.28 [0.62-1.23]  | 0.78±0.23 [0.57-1.21]           |
| Let-7a-5p         | 1.04±0.35 [0.70-1.52]  | 2.48±1.39 [1.04-5.30] (p=0.075) |
| <b>mRNA (RQ)</b>  |                        |                                 |
| <i>LIN28A</i>     | 1.48±0.288 [1.24-1.79] | 1.67±0.56 [0.90-2.23]           |
| <i>THBS3</i>      | 1.01±0.18 [0.98-1.21]  | 1.30±0.31 [1-1.73]              |

Results are shown as mean ± standard deviation; [inferior-superior] 95% confidence interval. Statistical significant differences are highlighted in bold. \* p<0.05, \*\* p<0.01, \*\*\*p<0.001 significant difference respect controls (Mann-Whitney U Test). Ct: cycle threshold; RQ: Relative Quantification using RNU48 as normalizer for miRNA and GUSB for mRNA.
